# Supplementary material
Source: PubMed Central journal article supplement (PMC4013910)

BROWN ET AL., SUPPLEMENTAL FIG. S1. Immunolocalization of RHOX8 protein in preantral follicles. While significantly weaker than mural granulosa of periovulatory follicles, RHOX8 protein can be detected in cumulus granulosa of primary and secondary follicles (arrowheads). This staining becomes less pronounced in preantral follicles as the layers of granulosa proliferate (arrows).

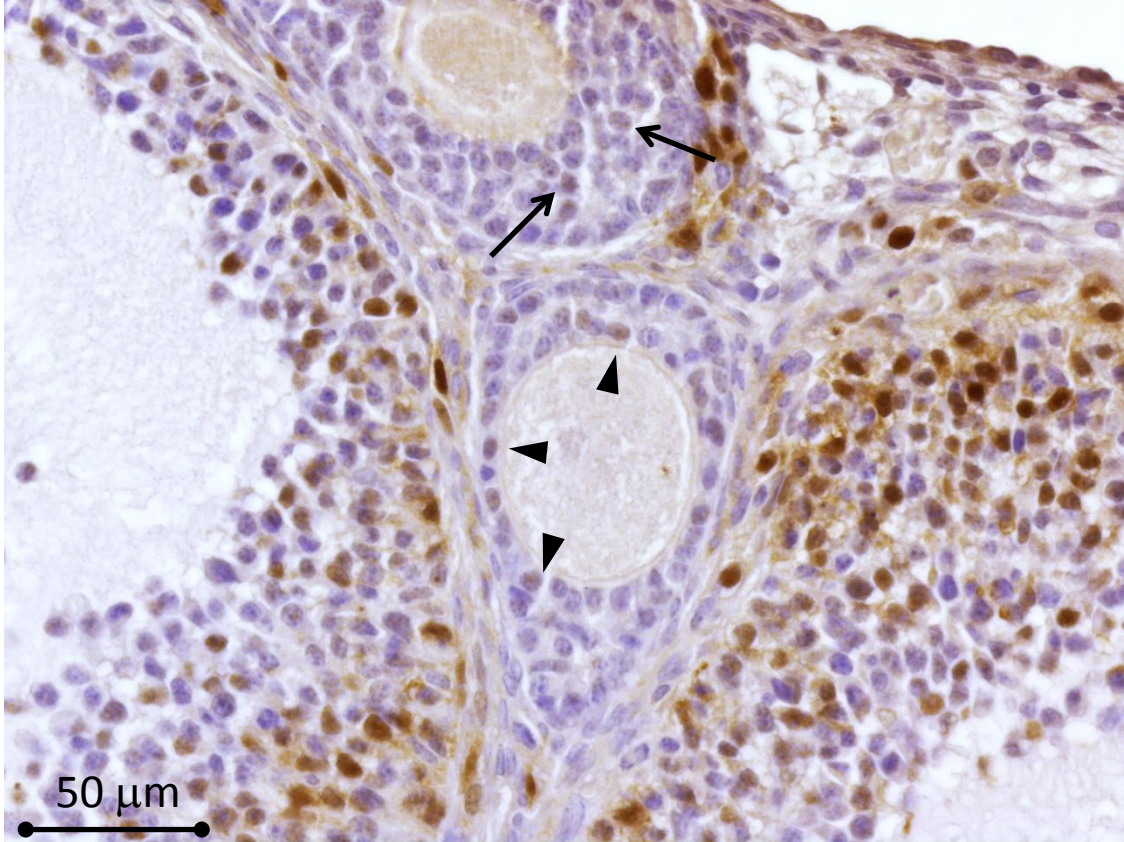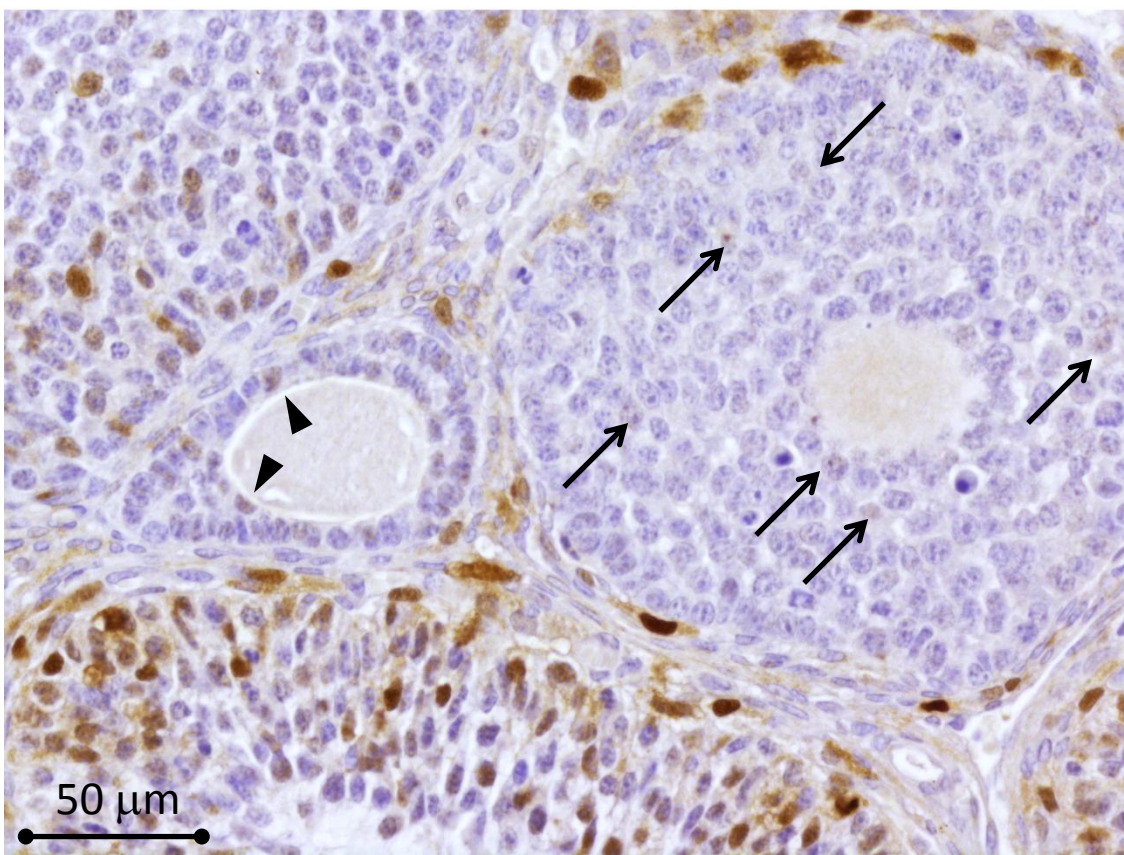

Supplement: supp_112.103267_biolreprod.112.103267-1.pdf [file supp_112.103267_biolreprod.112.103267-1.pdf]
